# Supplementary figures and images for: A putative structural mechanism underlying the antithetic effect of homologous RND1 and RhoD GTPases in mammalian plexin regulation
Source: eLife journal article supplement (doi:10.7554/elife.64304), 2021-06-11

# Figure supplemental 3

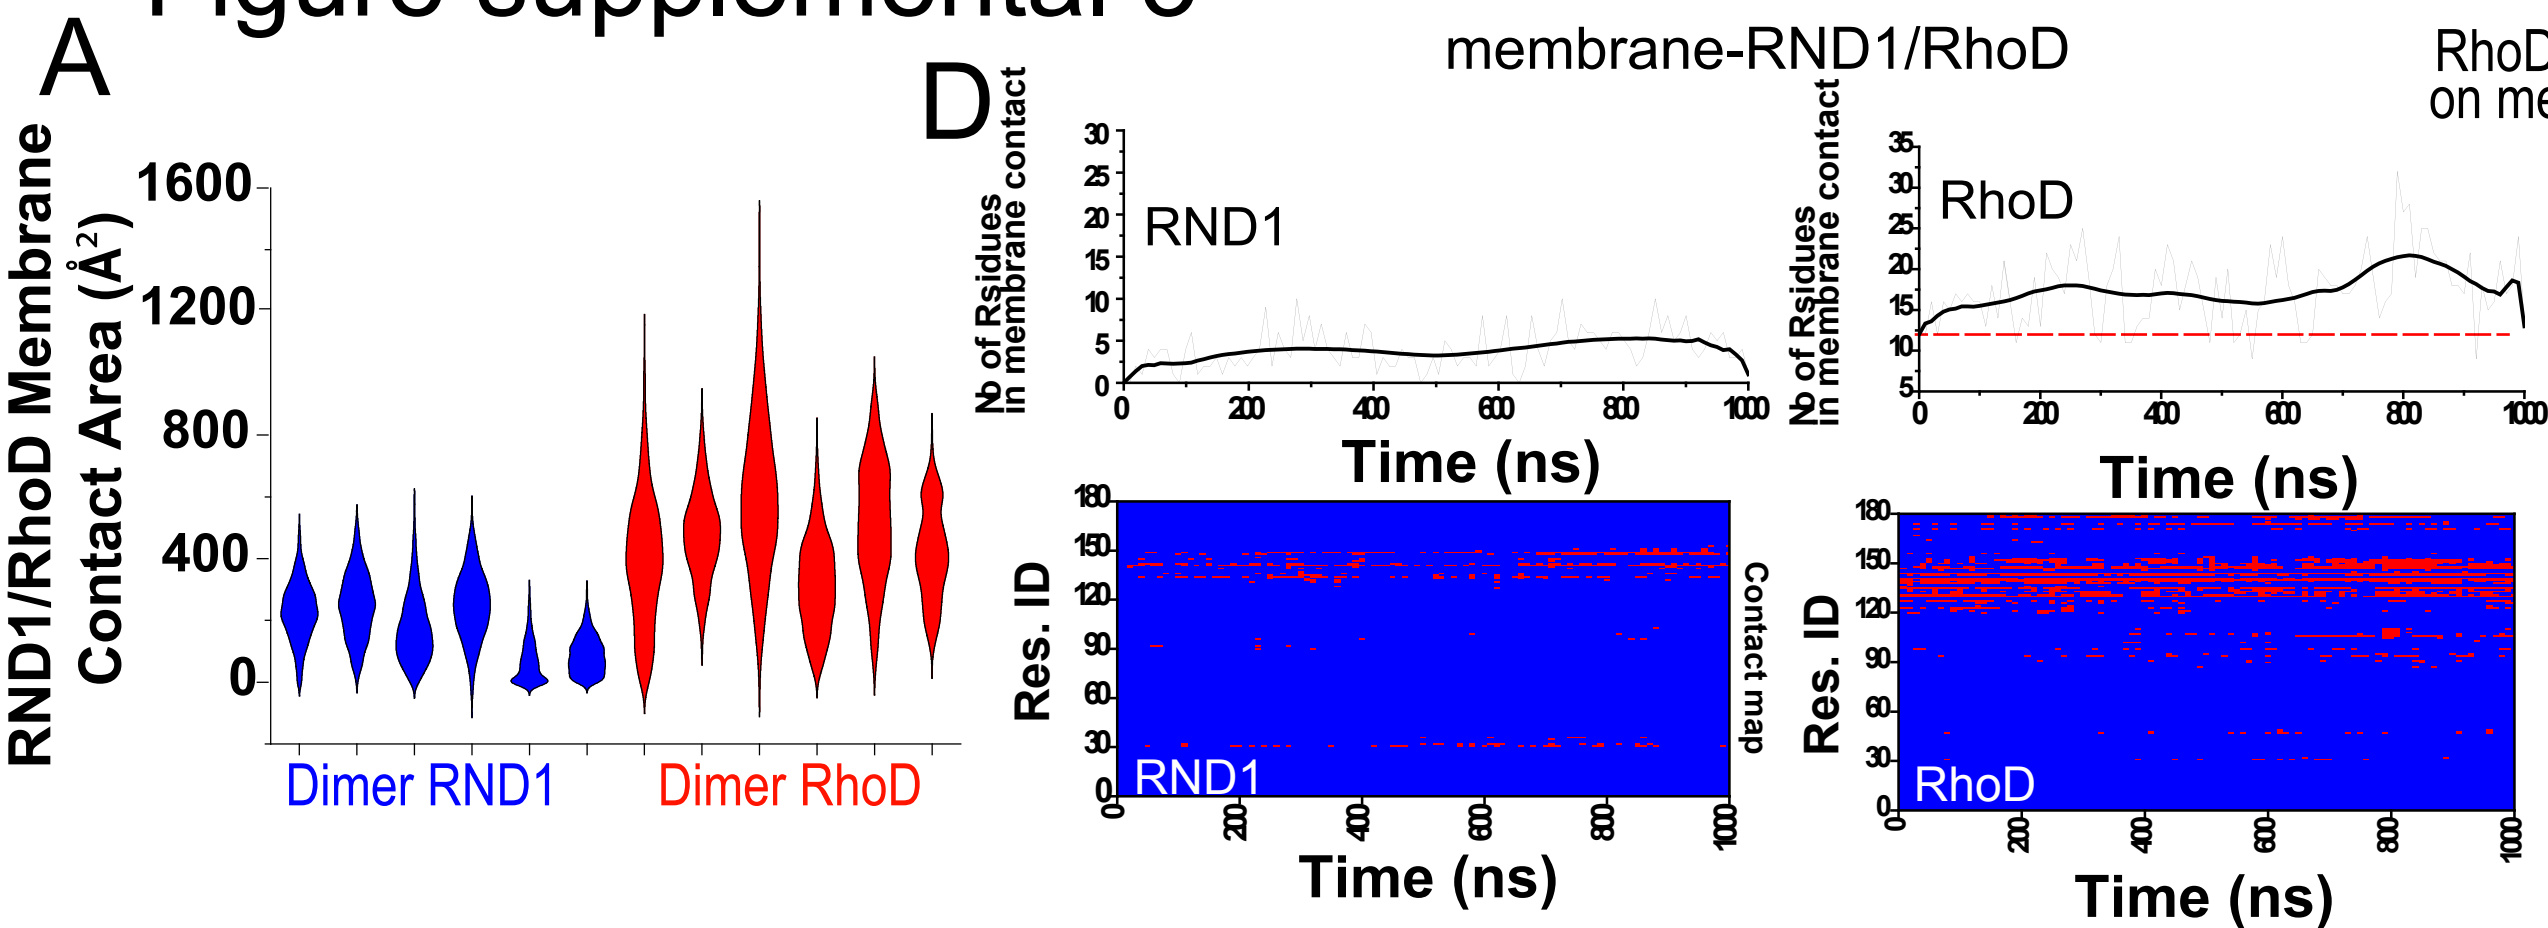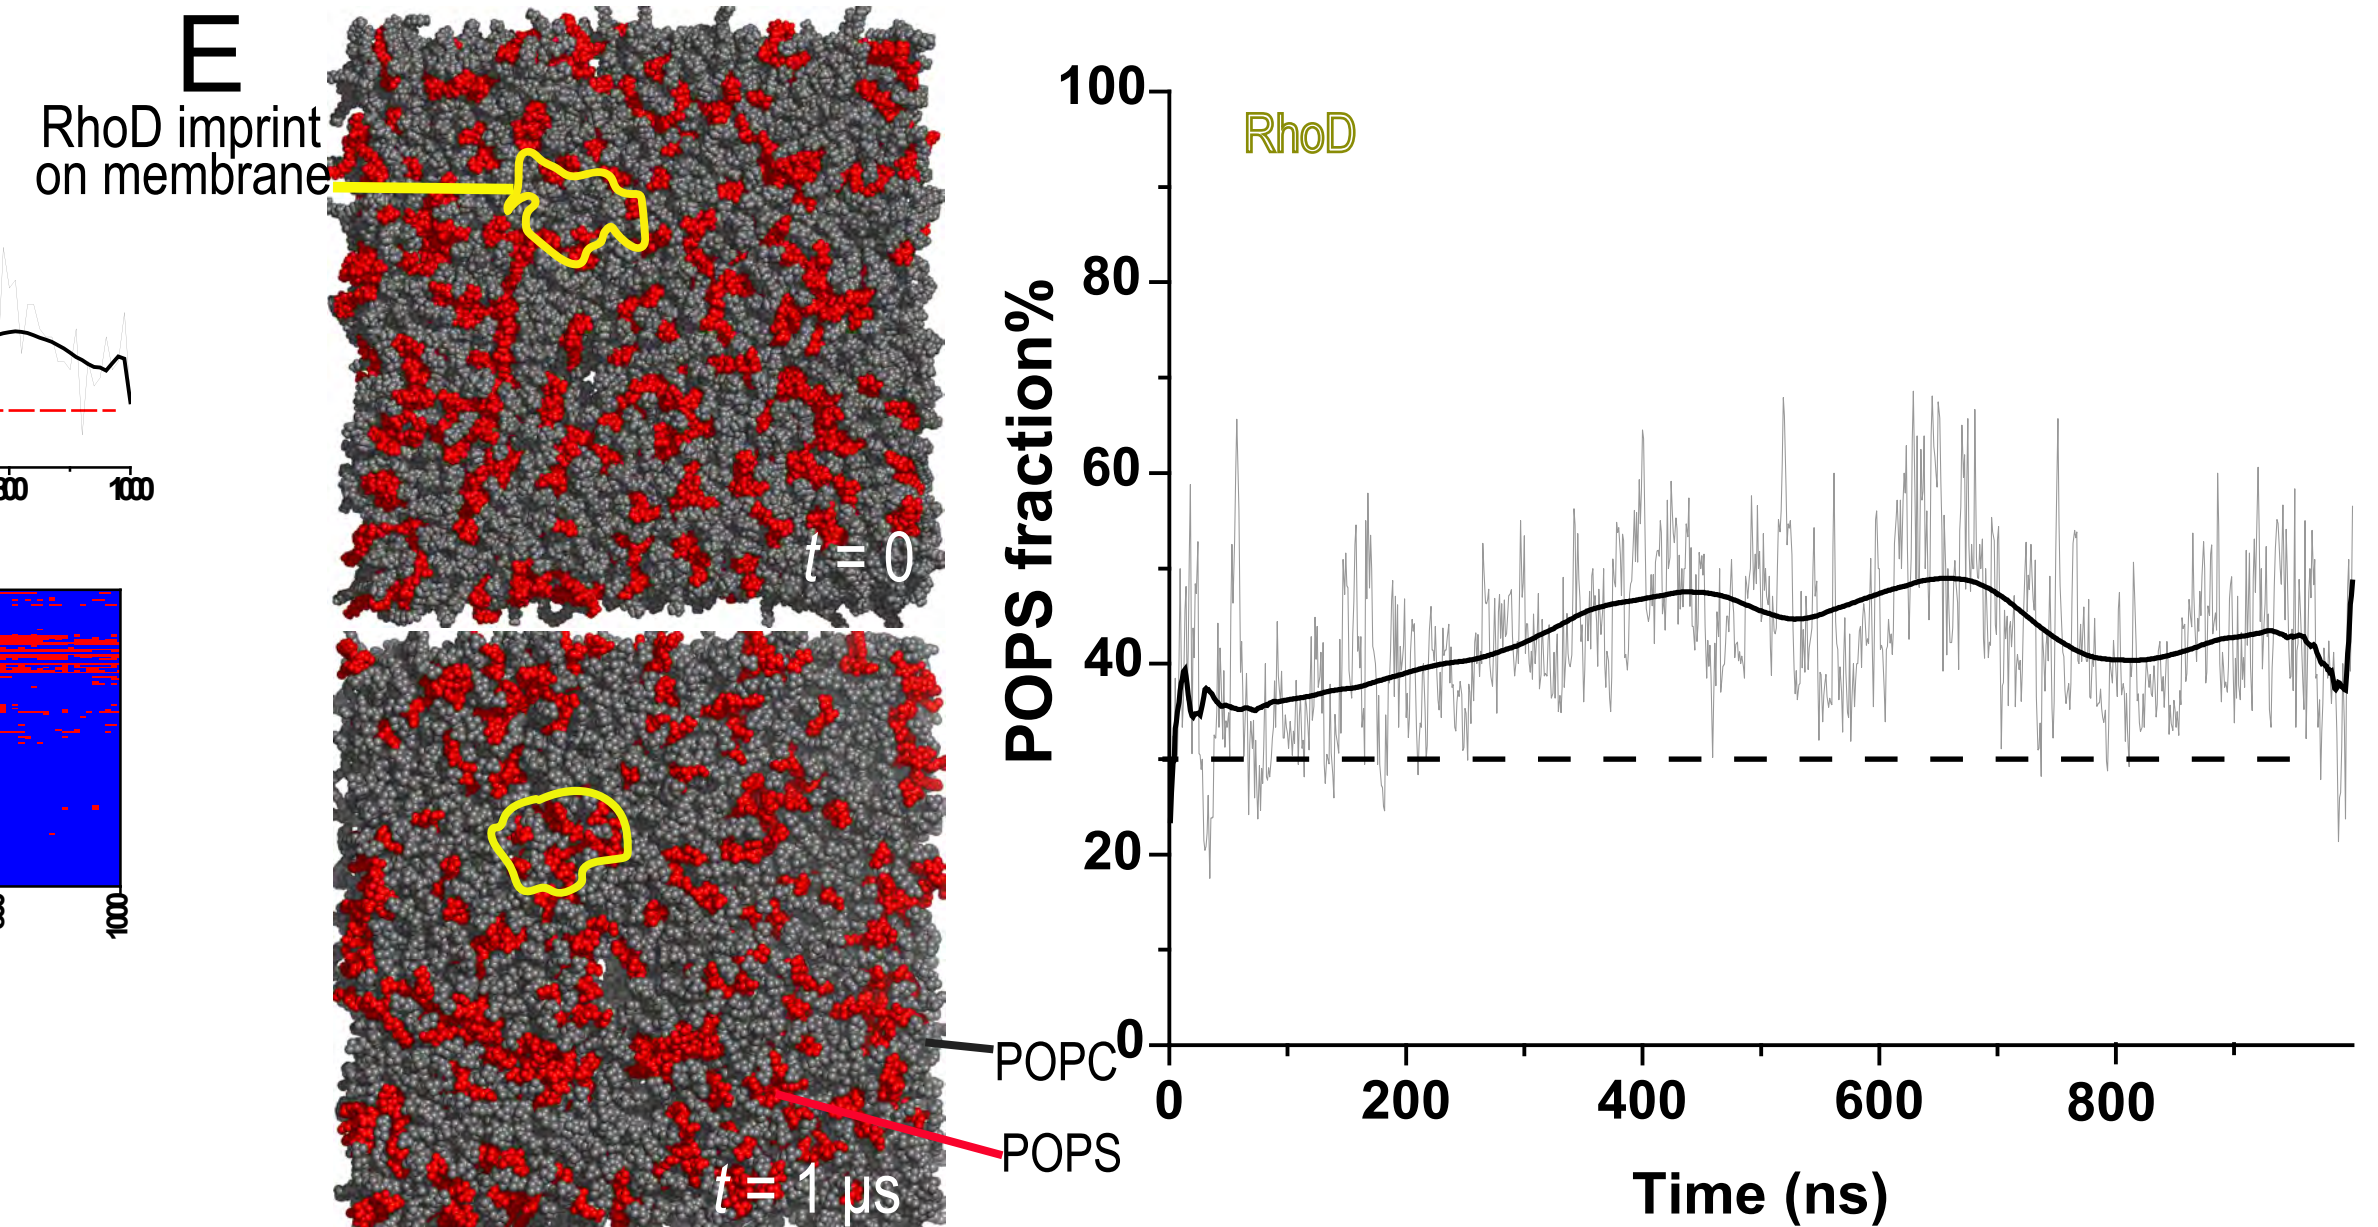

RhoD-membrane interaction leads to local enrichment of changed lipids

Supplement: supp [file elife-64304-supp-v1.zip]

# Figure supplemental 1

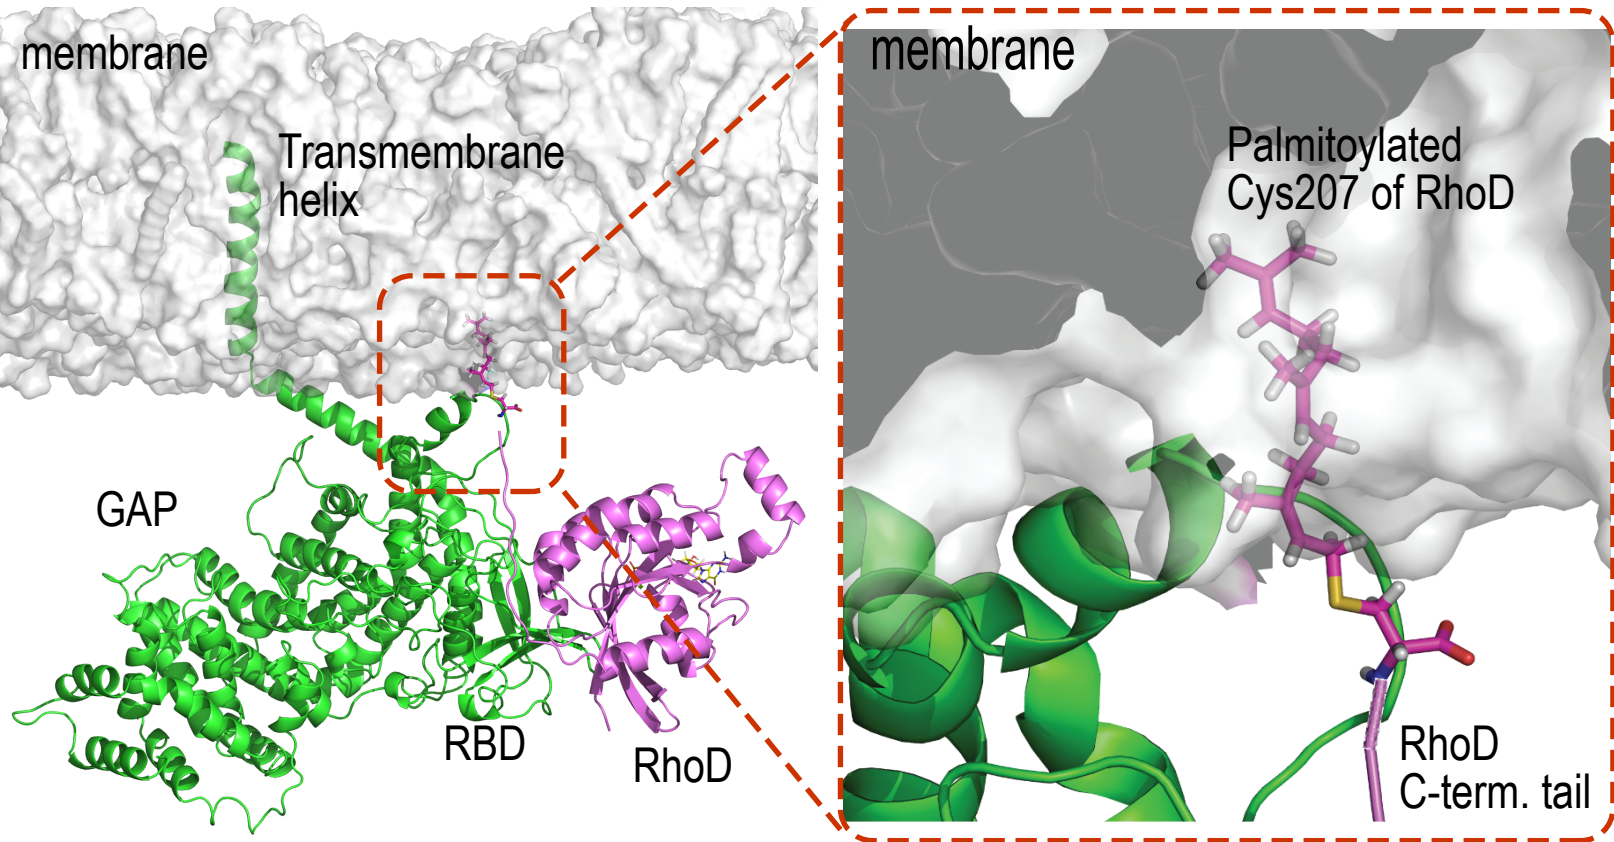

Supplement: supp [file elife-64304-supp-v1.zip]

# Figure supplemental 4

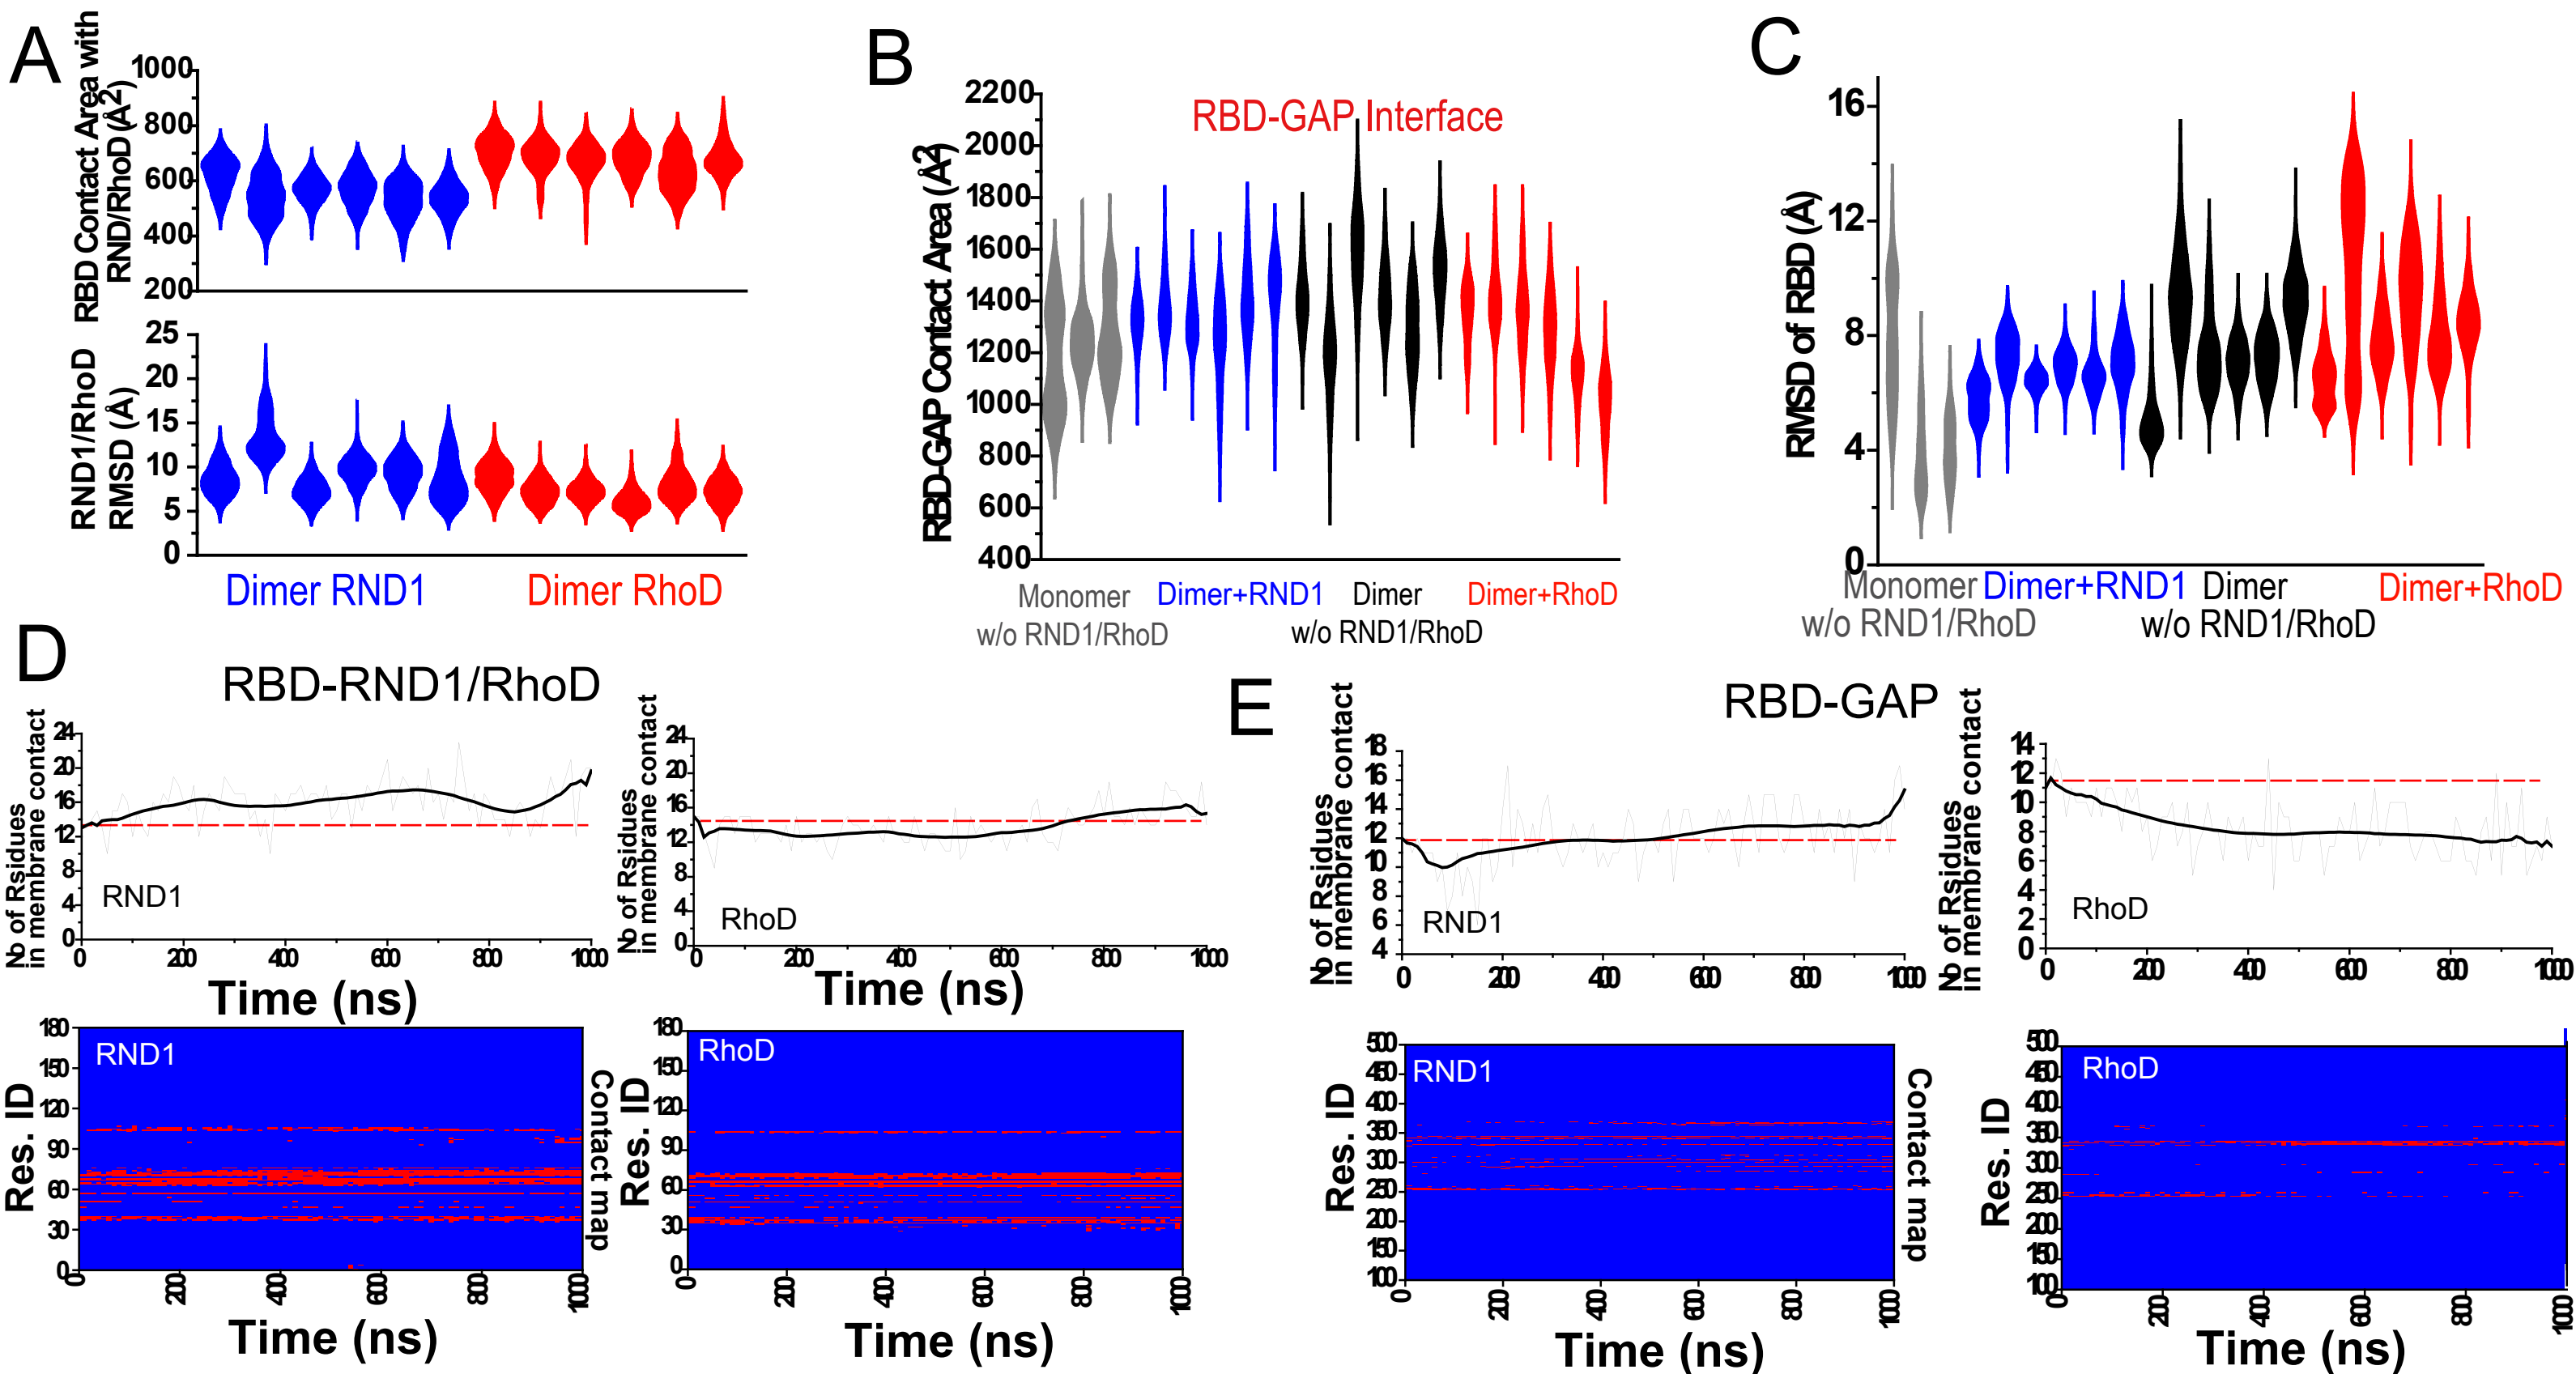

Supplement: supp [file elife-64304-supp-v1.zip]

# Figure supplemental 2

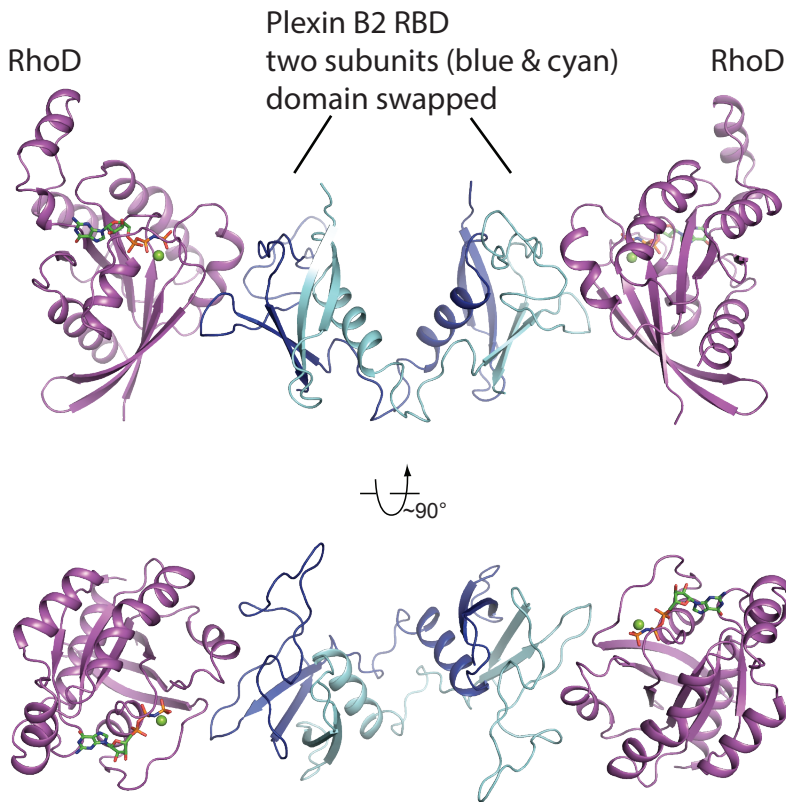

Supplement: supp [file elife-64304-supp-v1.zip]

# Figure supplemental 5

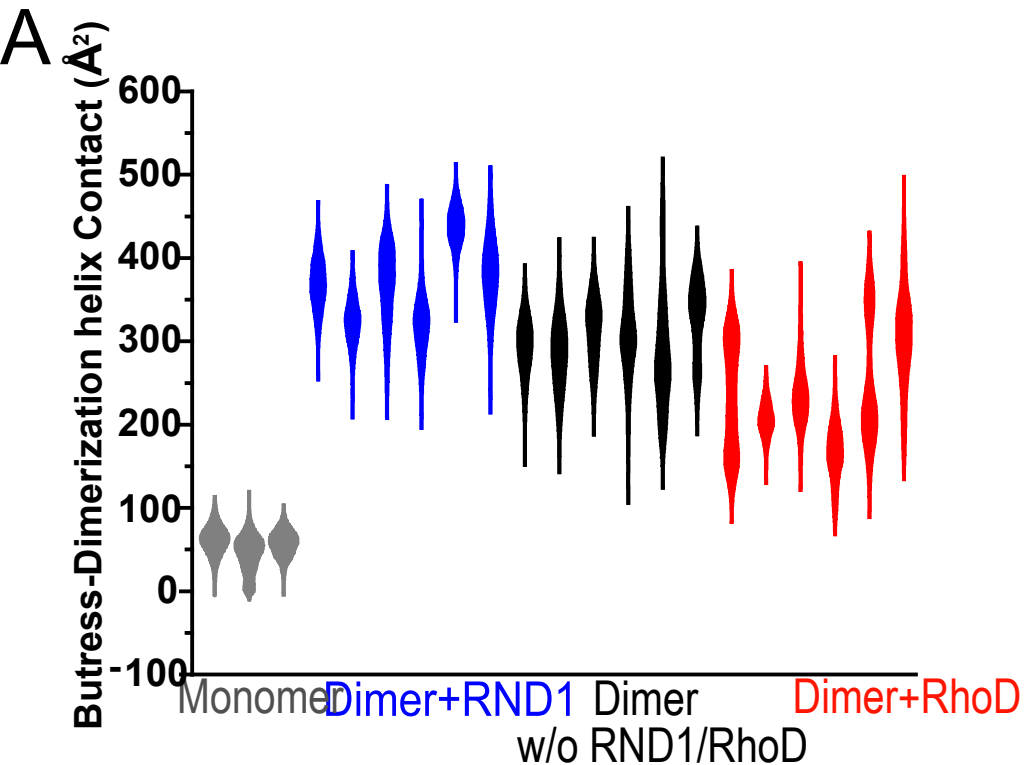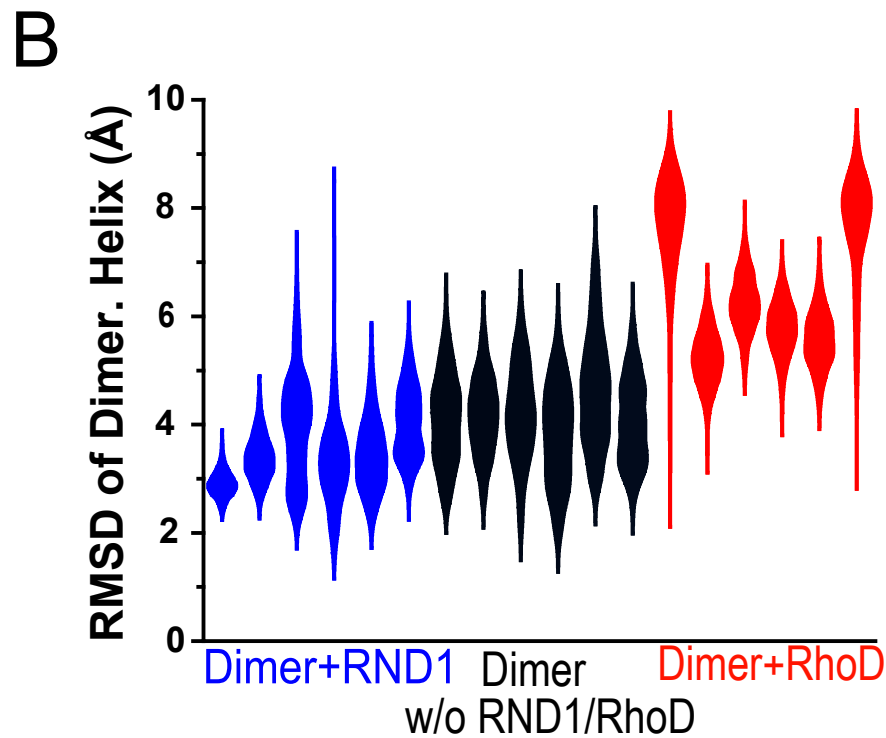

Supplement: supp [file elife-64304-supp-v1.zip]
